# Supplementary material
Source: HighWire-hosted journal article supplement (https://bmjopen.bmj.com/content/6/4/e011258)
Supplement: inline-supplementary-material-1 [file inline-supplementary-material-1.pdf]

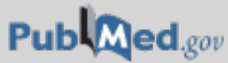

US National Library of Medicine  
National Institutes of Health

PubMed

[Advanced](#)

Search

[Help](#)

## Search Details

### Query Translation:

Search URL

### Result:

[522](#)

### Translations:

|                   |                                                                                                                                                                                                                           |
|-------------------|---------------------------------------------------------------------------------------------------------------------------------------------------------------------------------------------------------------------------|
| exercise          | "exercise"[MeSH Terms] OR "exercise"[All Fields]                                                                                                                                                                          |
| physical activity | "motor activity"[MeSH Terms] OR ("motor"[All Fields] AND "activity"[All Fields]) OR "motor activity"[All Fields] OR ("physical"[All Fields] AND "activity"[All Fields]) OR "physical activity"[All Fields]                |
| physical fitness  | "physical fitness"[MeSH Terms] OR ("physical"[All Fields] AND "fitness"[All Fields]) OR "physical fitness"[All Fields]                                                                                                    |
| strength training | "resistance training"[MeSH Terms] OR ("resistance"[All Fields] AND "training"[All Fields]) OR "resistance training"[All Fields] OR ("strength"[All Fields] AND "training"[All Fields]) OR "strength training"[All Fields] |
| weight training   | "weight lifting"[MeSH Terms] OR ("weight"[All Fields] AND "lifting"[All Fields]) OR "weight lifting"[All Fields] OR ("weight"[All Fields] AND "training"[All Fields]) OR "weight training"[All Fields]                    |
| overweight        | "overweight"[MeSH Terms] OR "overweight"[All Fields]                                                                                                                                                                      |
| Humans[Mesh]      | "humans"[MeSH Terms]                                                                                                                                                                                                      |
| body mass index   | "body mass index"[MeSH Terms] OR ("body"[All Fields] AND "mass"[All Fields] AND "index"[All Fields]) OR "body mass index"[All Fields]                                                                                     |

### Database:

PubMed

### User query:

(exercise OR physical activity OR physical fitness OR strength training OR weight training) AND (child\* OR adolescen\* OR boys OR girls) AND (overweight OR obes\*) AND random\* AND Humans[Mesh] AND (bmi OR body mass index) AND ( ( "2012/01/01"[PDat] : "2015/09/30"[PDat] ) )
